# Supplementary material
Source: PubMed Central journal article supplement (PMC7902405)
Supplement: NIHMS1630780-supplement-Supp_info.pdf [file NIHMS1630780-supplement-Supp_info.pdf]

**TITLE: Siah2 is expressed in adipocyte precursor cells and interacts with EBF1 and ZFP521 to promote adipogenesis**

**AUTHORS:** Thanh N. Dang<sup>1</sup>, Jessica L. Taylor<sup>1</sup>, Gail Kilroy<sup>1</sup>, Yongmei Yu<sup>1</sup>, David H. Burk<sup>1</sup>,  
Z. Elizabeth Floyd<sup>1,\*</sup>

**AFFILIATION:** <sup>1</sup>Pennington Biomedical Research Center, Louisiana State University System,  
Baton Rouge, LA

**CONTACT INFO:** Elizabeth Floyd: Pennington Biomedical Research Center, 6400 Perkins  
Road, Baton Rouge, LA 70808; [elizabeth.floyd@pbrc.edu](mailto:elizabeth.floyd@pbrc.edu); Tel. (225) 763-2724; Fax.  
(225) 763-0273

## A. SYBR Green

| Gene ID            | Gene Name                                        | Accession #    | Manufacturer | Sequence-Forward            | Sequence-Reverse          |
|--------------------|--------------------------------------------------|----------------|--------------|-----------------------------|---------------------------|
| <i>Zfp521</i>      | Zinc finger protein 521                          | NM_145492      | IDT          | 5' TGTGGCAAATCACATGATTGATGA | 5' ATCCCTTCGAAGCTGTGCTC   |
| <i>Siah2</i>       | Seven in absentia homolog 2                      | NM_009174      | IDT          | 5' ACCAGAGCATGAAGACATCTGTGA | 5' TGGGCATGCATGAGATGGGA   |
| <i>Ebf1</i>        | Early B-cell factor 1                            | NM_001290709   | IDT          | 5' ACAGCAATGGGATACGGACA     | 5' TGTGTGAGCAACTACTCGGCA  |
| <i>Pparg</i>       | Peroxisome proliferator activated receptor gamma | NM_001127330   | IDT          | 5' CACAATGCCATCAGGTTTGG     | 5' GCTGGTCGATCACTCGGAGATC |
| <i>Adipoq</i>      | Adiponectin                                      | NM_009605.4    | IDT          | 5' CATGCCGAAGATGACGTTACTA   | 5' ACGCTGAGCGATACACATAAG  |
| <i>Cd11b</i>       | Cluster of differentiation molecule 11B          | NM_001082960.1 | IDT          | 5' GAAAGTAGCAAGGAGTGTGTTTG  | 5' CAGTGTCTGGATATCTCCTTC  |
| <i>Pdgfra</i>      | Platelet derived growth factor receptor alpha    | NM_001083316   | IDT          | 5' CTGCACCAAGTCAGGTCCC      | 5' CTTCGGCTTCTCTGGGTGTT   |
| <i>Sca1</i>        | Stem cell antigen 1                              | NM_001271416   | IDT          | 5' TGTGCAGAAAGAGCTCAGGG     | 5' AGACTCCATCAGGGTAGGGG   |
| <i>fapb4 (aP2)</i> | fatty acid binding protein 4                     | NM_024406.2    | IDT          | 5' GCTTTGCCACAAGGAAAGTG     | 5' CGACTTTCATCCCCTTCTG    |

## B. Taqman

| Gene ID       | Gene Name                               | Accession # | Manufacturer | Probe                        |
|---------------|-----------------------------------------|-------------|--------------|------------------------------|
| <i>Zfp423</i> | Zinc finger protein 423                 | NM_033327.2 | ABI          | 5' TGTCCTGGAGATGGTGATGACGACC |
| <i>Ubb</i>    | Ubiquitin B                             | NM_011664.1 | IDT          | 5' CTAGGGTGATGGTCTTGCCGGTC   |
| <i>Hprt</i>   | Hypoxanthine phosphoribosyl transferase | NM_013556.2 | ABI          | 5' GGACTGATTATGGACAGGACTGAAA |
| <i>Lpl</i>    | Lipoprotein lipase                      | NM_008509.2 | ABI          | 5' AATAGAATTACTGGTTTGGATCCAG |

## C. Antibody

| Antibody                    | Application | Concentration             | Manufacturer            | Catalog #   |
|-----------------------------|-------------|---------------------------|-------------------------|-------------|
| $\alpha$ -Flag              | WB/IP       | 1:500                     | Sigma                   | F1804       |
| $\alpha$ -HA                | WB          | 1:1000                    | Covance                 | MMS-101R    |
| $\alpha$ -EBF1              | WB          | 1:1000                    | Abcam                   | ab108369    |
| $\alpha$ - $\beta$ -actin   | WB          | 1:10,000                  | Bethyl                  | A300-491A   |
| $\alpha$ -SIAH2             | WB          | 1:1000                    | LsBio                   | LS-C112149  |
| $\alpha$ -GFP               | WB          | 1:1000                    | Cell Signaling          | 2555        |
| $\alpha$ -ZFP521            | WB          | 1:1000                    | Antibodies-Online       | ABIN1031686 |
| $\alpha$ -mouse HRP         | WB          | 1:10,000                  | Jackson Immuno Research | 115-035-003 |
| $\alpha$ -rabbit HRP        | WB          | 1:10,000                  | Jackson Immuno Research | 111-035-003 |
| Biotinylated CD11b          | MACS        | According to Manufacturer | Miltenyi Biotec         | 130-109-362 |
| Biotinylated PDGFR $\alpha$ | MACS        | According to Manufacturer | Miltenyi Biotec         | 130-101-905 |
| Biotinylated SCA1           | MACS        | According to Manufacturer | Miltenyi Biotec         | 130-101-995 |
| $\alpha$ -Goat Alexa 647    | IHC         | 1:200                     | Jackson Immuno Research | 705605147   |
| $\alpha$ -Rabbit Alexa 488  | IHC         | 1:200                     | Invitrogen              | A21206      |
| $\alpha$ -PDGFR $\alpha$    | IHC         | 1:100                     | R&D Systems             | AF1062      |
| $\alpha$ -PLIN1             | IHC         | 1:500                     | Cell Signaling          | 9349S       |
| $\alpha$ -CD31              | IHC         | 1:1000                    | R&D Systems             | AF3628-SP   |
| $\alpha$ -IBA1              | IHC         | 1:100                     | Wako                    | 019-19741   |

Where indicated, western blots (WB) were carried out in 2% BSA in 25 mM Tris-Cl, pH 8.0 with 150 mM NaCl, 0.1% Tween 20 (TBS-T) or FLAG epitope tag in 1% BSA in TBS only. The results were visualized using HRP-conjugated secondary antibodies and chemiluminescence (Thermo Fisher/Pierce).

**Table S1:** List of primers and antibodies. A) SYBR primer sets. B) Taqman probes. C) Antibodies.

IP: immunoprecipitation; WB: Western blot; IHC: immunohistochemistry; MACS: magnetic activated cell sorting.

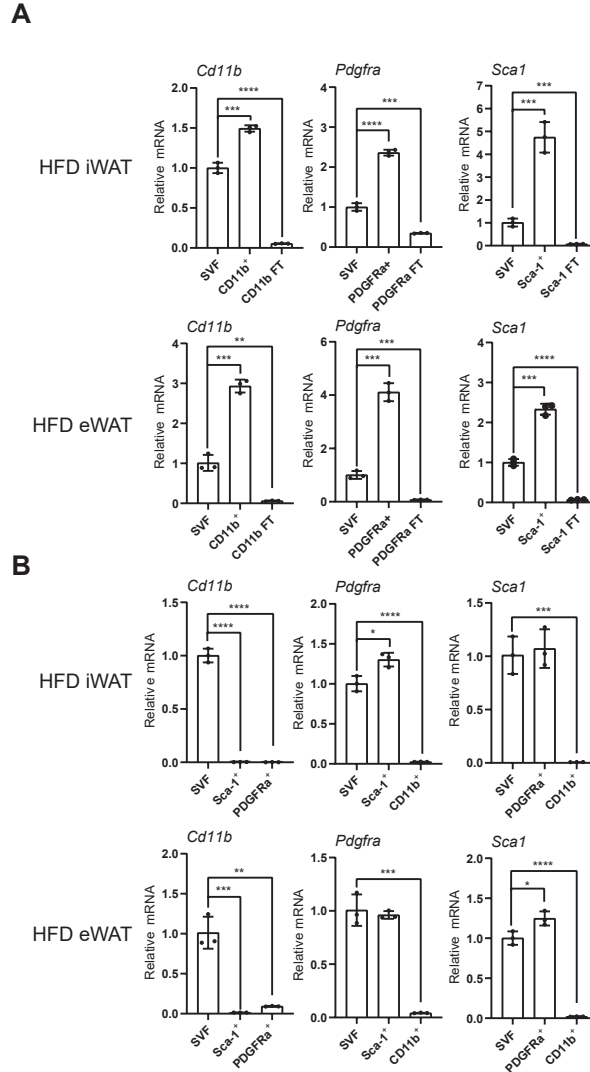

**Figure S1:** Magnetic immuno-purification efficiency and specificity. Macrophages ( $CD11b^+$ ) and adipocyte precursor ( $PDGFR\alpha^+$  or  $Sca1^+$ ) cells were positively selected from stromal vascular fraction (SVF) of male C57BL/6J mice on a 60% high fat diet (HFD) via magnetic bead cell sorting. *Pdgfralpha*, *Cd11b*, and *Sca1* mRNA levels were assayed from positive-selected fraction ( $PDGFR\alpha^+$ ,  $Sca1^+$ , or  $CD11b^+$ ) and flow-through fraction (FT) to compare against total SVF cells (SVF) by qRT-PCR. **A)** Magnetic immuno-purification efficiency was assessed by comparing *Pdgfralpha*, *Cd11b*, or *Sca1* mRNA expression to total SVF within each respective cell-sorting experiment. **B)** *Pdgfralpha*, *Cd11b*, or *Sca1* mRNA expression of positively-selected cells compared against total SVF between cell-sorting experiments to assess if cross-over binding occurred. Each data point represents a technical replicate from a pooled sample with  $N = 8$  mice/group. Figures depict mean  $\pm$  SD; \*,  $p < 0.05$ ; \*\*,  $p \leq 0.01$ ; \*\*\*,  $p \leq 0.0001$ ; \*\*\*\*,  $p \leq 0.00001$ .

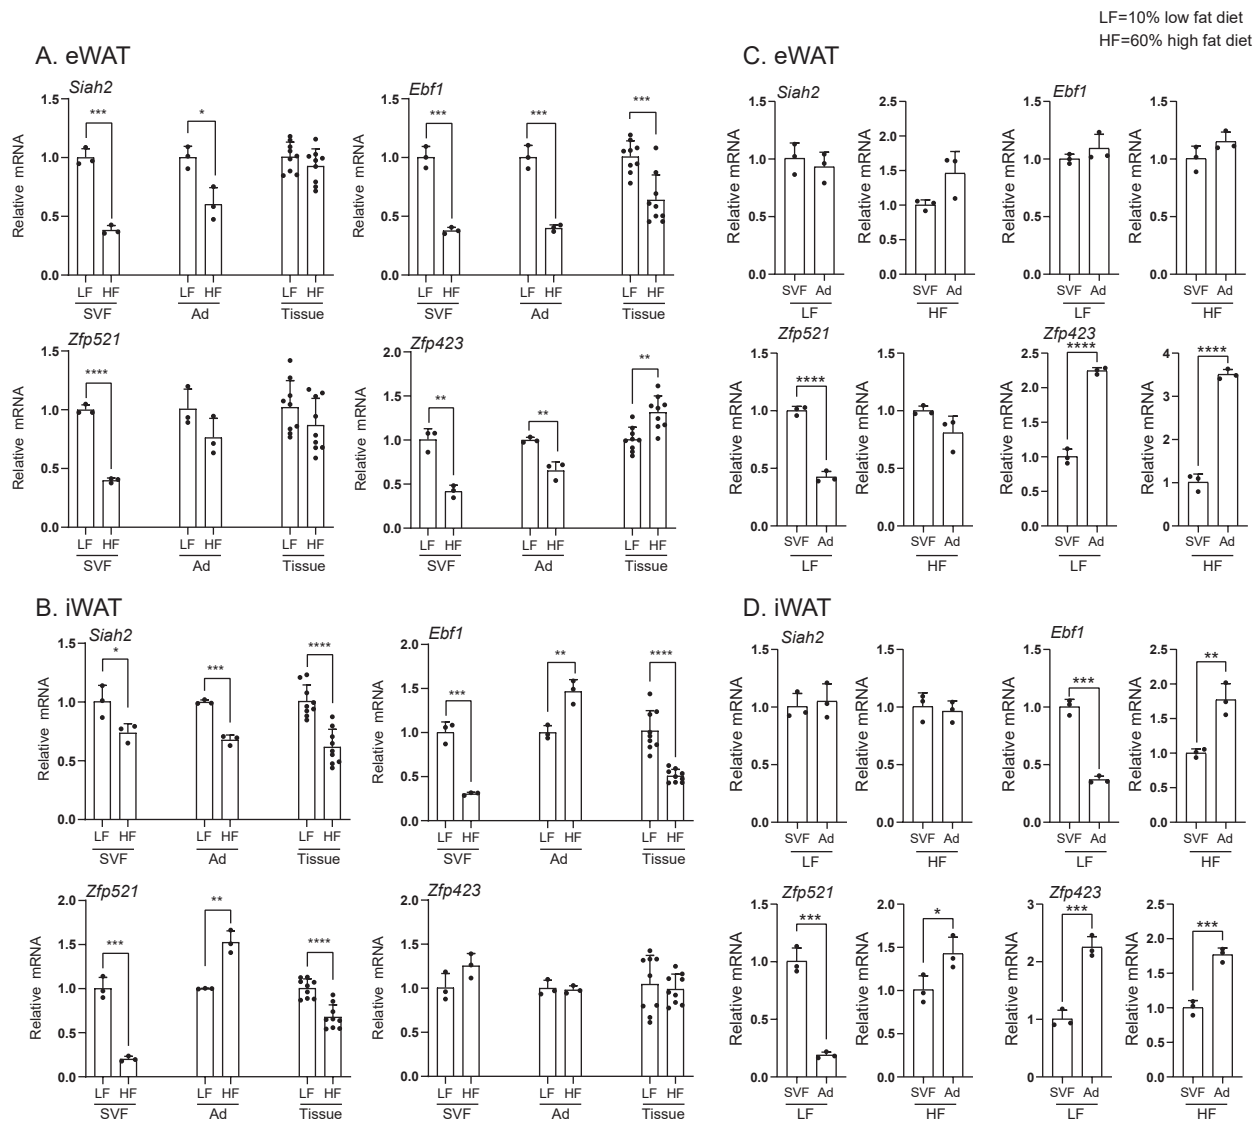

**Figure S2:** Diet-induced obesity regulates *Siah2*, *Ebf1*, *Zfp521*, and *Zfp423* gene expression. Ten-week old wild-type C57BL/6J male mice fed either a 10% low-fat diet (LF) or 60% high-fat diet (HF) for four-week were purchased from Jackson Laboratory (N=3 mice/group). Stromal vascular fraction (SVF), adipocyte fraction (Ad), and whole tissue (Tissue) from epididymal (eWAT) and inguinal (iWAT) adipose tissues were collected. *Siah2*, *Ebf1*, *Zfp521*, and *Zfp423* gene expression were analyzed by qRT-PCR. Gene expression was normalized to *Ubb* gene expression and compared to LF within each respective sample group for eWAT (A) or iWAT (B). Gene expression from eWAT (C) or iWAT (D) compared between the adipose tissue fractions. Stromal vascular fraction and adipocyte fraction were pooled into a single sample from 3 mice while tissues were analyzed from each mouse separately. Points on the bar graph represent technical replicates. Figures depict mean  $\pm$  SD; \*,  $p < 0.05$ ; \*\*,  $p \leq 0.01$ ; \*\*\*,  $p \leq 0.0001$ ; \*\*\*\*,  $p \leq 0.00001$ .
